# Supplementary material for: Exposure to oxLDL impairs TGF-β activity in human tendon cells
Source: Springer Nature journal article supplement (doi:10.1186/s12891-023-06308-x), 2023-03-16

# Exposure to oxLDL impairs TGF- $\beta$ activity in human tendon cells

Rouhollah Mousavizadeh<sup>1</sup>, Charlie M. Waugh<sup>1</sup>, Erin DeBruin<sup>1</sup>, Robert G. McCormack<sup>2</sup>, Vincent Duronio<sup>3</sup>, Alex Scott<sup>1</sup>

1. Department of Physical Therapy, Faculty of Medicine, The University of British Columbia, Vancouver, Canada

2. Department of Orthopaedics, Faculty of Medicine, The University of British Columbia, Vancouver, BC, Canada

3. Department of Medicine, Faculty of Medicine, The University of British Columbia, Vancouver, Canada

## Supplementary information

The Uncropped images of blots used in figure 3c:

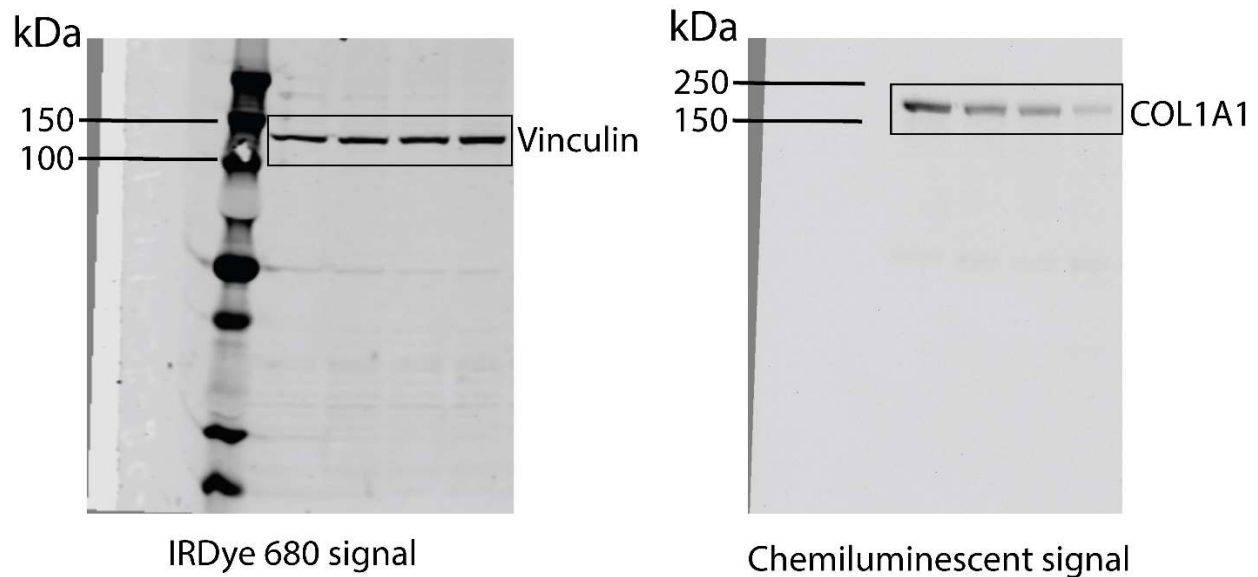

Supplement: MOESM2 [file 24631924]
